# Supplementary material
Source: HighWire-hosted journal article supplement (https://bmjopen.bmj.com/content/13/6/e073337)
Supplement: inline-supplementary-material-1 [file inline-supplementary-material-1.pdf]

### Search strategy for Medline/Ovid

- 1.Students, Medical/
- 2.exp Physicians/
- 3.Family practice/
- 4.General practice/
- 5.medical student\*.ti,ab,kf.
- 6.clerkship\*.ti,ab,kf.
- 7.undergraduate medic\*.ti,ab,kf.
- 8.graduate medic\*.ti,ab,kf.
- 9.(Post?graduate\* adj2 medicine).ti,ab,kf.
- 10.(Intern or Interns or Internship).ti,ab,kf.
- 11.residency.ti,ab,kf.
- 12.junior doctor\*.ti,ab,kf.
- 13.(surgical or medical or clinical) adj2 (teach\* or instruct\* or pedagog\* or curriculum or curricula or student\* or undergraduate\* or graduate\*).ti,ab,kf.
- 14.physician\*.ti,ab,kf.
- 15.(allergist\* or Anesthesiologist\* or Cardiologist\* or Dermatologist\* or Endocrinologist\* or Gastroenterologist\* or General Practitioner\* or Geriatrician\* or hospitalist\* or Nephrologist\* or Neurologist\* or Oncologist\* or Ophthalmologist\* or Otolaryngologist\* or pathologist\* or Pediatrician\* or physiatrist\* or Pediatrician\* or pulmonologist\* or Radiologist\* or Rheumatologist\* or Surgeon\* or Urologist\* or gynecologist\* or obstetrician\*).ab,kf,ti.
- 16.(family or medical) adj1 doctor\*.ab,kf,ti.
- 17.medical adj1 profession\*.ab,kf,ti.
- 18.(family or clinical or general) adj1 practice\*.ti,ab,kf.
19. 1 OR 2 OR 3 OR 4 OR 5 OR 6 OR 7 OR 8 OR 9 OR 10 OR 11 OR 12 OR 13 OR 14 OR 15 OR 16 OR 17 OR 18
  
- 20.exp Emotional Intelligence/
- 21.Metacognition/
- 22.Emotional regulation/
- 23.Adaptation, psychological/
- 24.Emotions/
- 25.exp Self-control/
- 26.Mindfulness/
27. emotional adj1 (intelligence\* or adjustment\* or adaptation\* or regulation\* or self-regulation\* or competence\* or skill\*).ti,ab,kf.
28. social adj1 (intelligence\* or comparison\*).ti,ab,kf.
29. empathy.ti,ab,kf
30. psychological adj1 (adjustment\* or adaptation\*).ti,ab,kf.
31. meta-cognition\* or metacognition\* or metaemotion\* or meta-emotion\* or metamemor\* or meta-memor\*.ti,ab,kf.
32. (metacognitive or meta-cognitive) adj1 (knowledge\* or control\* or awareness\*).ti,ab,kf.
33. coping adj1 (skill\* or behavior\* or strateg\*).ti,ab,kf.
34. adaptative adj1 behavio\*.ti,ab,kf.

35. self adj1 (control\* or regulation\* or perception\* or confidence\* or esteem\* or evaluation\* or appraisal\* or assessment\* or disclosure\* or efficac\* or compassion\* or criticism\* or forgiveness\* or awareness\* or consciousness\* or knowledge\* or criticism\*).ti,ab,kf.
36. sense adj1 coherence.ti,ab,kf.
37. salutogenes\*.ti,ab,kf.
38. mindfulness.ti,ab,kf.
39. (mental or compassion or "health professional alert") adj1 fatigue\*.ti,ab,kf.
40. 20 OR 21 OR 22 OR 23 OR 24 OR 25 OR 26 OR 27 OR 28 OR 29 OR 30 OR 31 OR 32 OR 33 OR 34 OR 35 OR 36 OR 37 OR 38 OR 39
41. Clinical Competence/  
42. Diagnosis, Differential/  
43. Clinical Decision-Making/  
44. exp Diagnostic Errors/  
45. Delayed Diagnosis/  
46. exp Medical error/  
47. patient harm/  
48. Disease, Iatrogenic/  
49. Thinking/  
50. Decision Making/  
51. avoidance learning/  
52. choice behavior/  
53. decision making, shared/  
54. exp problem solving/  
55. intuition/  
56. clinical adj1 (competenc\* or skill\* or reasoning\* or judgment\* or decision-making or "decision making").ti,ab,kf.
57. (differential or missed or missing or error\* or "blind spot" or delayed or late) adj1 diagnos\*.ti,ab,kf.
58. misdiagnos\*.ti,ab,kf.
59. "false negative reaction".ti,ab,kf.
60. "false positive reaction".ti,ab,kf.
61. observer variation\*.ti,ab,kf.
62. treatment outcome\*.ti,ab,kf.
63. medical adj1 mistake\*.ti,ab,kf.
64. (wrong-procedure or surgical or medication or medical or "drug use" or "high-alert drug" or "LASA medication") adj1 error\*.ti,ab,kf.
65. (wrong-site or wrong-patient) adj1 surgery.ti,ab,kf.
66. "critical medical incidents".ti,ab,kf.
67. ("look alike sound alike" or "lookalike soundalike") adj2 error\*.ti,ab,kf.
68. inappropriate adj1 (prescribing\* or prescription\*).ti,ab,kf.
69. over-prescribing\* or overprescribing.ti,ab,kf.
70. over-testing\* or overtesting.ti,ab,kf.
71. ("near miss healthcare" or "close calls") adj1 healthcare.ti,ab,kf.
72. patient adj1 harm\*.ti,ab,kf.
73. iatrogenic adj1 diseases\*.ti,ab,kf.

- 74.hospital-acquired adj1 condition\*.ti,ab,kf.  
75.thinking adj1 (skill\* or critical).ti,ab,kf.  
76.decision adj1 making\*.ti,ab,kf.  
77.avoidance adj1 (behaviour or behavior or learning).ti,ab,kf.  
78.choice adj1 (behavior or behaviour).ti,ab,kf.  
79.decision adj1 making adj1 shared.ti,ab,kf.  
80.problem solving\*.ti,ab,kf.  
81.heuristic.ti,ab,kf.  
82."rule of thumb".ti,ab,kf.  
83.gut feeling\*.ti,ab,kf.  
84.intuition\*.ti,ab,kf.  
85.health adj1 service\* adj1 (misuse\* or abuse\* or underutilization\* or underuse\* or overuse\* or overutilization\*).ti,ab,kf.  
86.medical adj1 overuse\*.ti,ab,kf.  
87."unnecessary health care".ti,ab,kf.  
88.preference adj1 misdiagnos\*.ti,ab,kf.  
89."unwanted medical care".ti,ab,kf.  
90.overtreatment\* or over-treatment\*.ti,ab,kf.  
91.polypharmacy\* or polymedication\*.ti,ab,kf.  
92.unnecessary adj1 (procedure\* or surger\*).ti,ab,kf.  
93. 41 OR 42 OR 43 OR 44 OR 45 OR 46 OR 47 OR 48 OR 49 OR 50 OR 51 OR 52 OR 53 OR 54 OR 55 OR 56 OR 57 OR 58 OR 59 OR 60 OR 61 OR 62 OR 63 OR 64 OR 65 OR 66 OR 67 OR 68 OR 69 OR 70 OR 71 OR 72 OR 73 OR 74 OR 75 OR 76 OR 77 OR 78 OR 79 OR 80 OR 81 OR 82 OR 83 OR 84 OR 85 OR 86 OR 87 OR 88 OR 89 OR 90 OR 91 OR 92  
  
94. 19 AND 40 AND 93  
95. limit 94 to (English or French)  
96. (comment or editorial).pt  
97. 95 not 96
